# Supplementary material
Source: publisher figshare collection journal article supplement (https://gsajournals.figshare.com/ndownloader/files/14555717)
Supplement: Supplementary file 1 [file 14555717]

| Phylogenetic group | | | | Species | | Genome assembly version | MT1 | | | | MT2 | | | | Mel1c | Mel1d |
| --- | --- | --- | --- | --- | --- | --- | --- | --- | --- | --- | --- | --- | --- | --- | --- | --- |
| Chondrichtyes | | | | ***Callorhinchus milli***  (elephant shark) | Cm | Callorhinchus_milii-6.1.3 GCF_000165045.1 | XP_007891048.1 | | | | XP_007901736.1 | | | | XP_007891233.1 | XP_007900192.1 |
| Osteichtyes | Sacropterygii | Tetrapods | Birds | **Gallus gallus**  (chicken) | Gg | GRCg6a GCF_000002315.5 | NP_990693.1 | | | | NP_001280032.1 | | | | NP_990692.1 |  |
| Reptiles | ***Anolis carolensis***  (green anole lizard) | Ac | AnoCar2.0 GCF_000090745.1 | XP_008109959.1 | | | | XP_003219378.2 | | | | XP_016851829.1 | XP_003217534.1 |
| ***Pelodiscus sinensis***  (Chinese softshell turtle) | Ps | PelSin_1.0 GCF_000230535.1 | K7F1Q7 | | | | K7F0W9 | | | | K7EWS7 | K7FLB8 |
| Mammals | ***Bos taurus***  (cattle) | Bt | ARS-UCD1.2 GCF_002263795.1 | XP_002698702.1 | | | | NP_001193836.2 | | | | XP_002699692.1 |  |
| ***Homo sapiens***  (human) | Hs | GRCh38.p12 GCF_000001405.38 | NP_005949.1 | | | | NP_005950.1 | | | | NP_004215.2 |  |
| ***Ornithorhynchus anatinus***  (platypus) | Oa | Ornithorhynchus_anatinus-5.0.1 GCF_000002275.2 | XP_001519132.1 | | | | XP_003430825.1 | | | | XP_001512937.1 |  |
| Amphibians | ***Xenopus tropicalis***  (western clawed frog) | Xt | Xenopus_tropicalis_v9.1 GCF_000004195.3 | F7DNS9 | | | | F6QU28 | | | | L7N2L1 | F6XUW8 |
| Lobe-finned | | ***Latimeria chalumnae***  (coelacanth) | Lc | LatCha1 GCF_000225785.1 | XP_014352214.1 | | | | XP_006002793.1 | | | | XP_014341506.1 | XP_014351618.1 |
| Actinopterygii | Holostei | | ***Lepisosteus oculatus***  (spotted gar) | Lo | LepOcu1 GCF_000242695.1 | **pseudogene : LOC107077181** | | | | XP_006627897.1 | | | | XP_006632834.2 | XP_006631980.2 |
| Teleosts |  | ***Teleost-specific 3R duplications :*** | | | **a** | | **b** | | **a** | | **b** | |  |  |
| ***Astyanax mexicanus***  (Mexican cavefish) | Am | Astyanax_mexicanus-2.0 GCF_000372685.2 | XP_022537856.1 | | XP_007247563.2 | | XP_022525043.1 | | XP_015460802.1 | | XP_007257556.3 | XP_007246501.1 |
| ***Danio rerio***  (zebrafish) | Dr | GRCz11 GCF_000002035.6 | NP_571468.1 | | XP_021328498.1 | | NP_571470.1 | | [NP_571469.1](https://www.ncbi.nlm.nih.gov/protein/NP_571469.1) | | [NP_001154956.1](https://www.ncbi.nlm.nih.gov/protein/NP_001154956.1) | [NP_001153381.1](https://www.ncbi.nlm.nih.gov/protein/NP_001153381.1) |
| ***Takifugu rubripes***  (tiger pufferfish) | Tr | FUGU5 GCF_000180615.1 | H2SE17 | |  | |  | | A0A3B5JZ98 | | H2T0U7 | H2UJ01 |
| ***Oreochromis niloticus***  (Nile tilapia) | On | O_niloticus_UMD_NMBU GCF_001858045.2 | [XP_003449745.1](https://www.ncbi.nlm.nih.gov/protein/XP_003449745.1) | |  | |  | | XP_003446857.1 | | [XP_003445923.1](https://www.ncbi.nlm.nih.gov/protein/XP_003445923.1) | [XP_003447660.2](https://www.ncbi.nlm.nih.gov/protein/XP_003447660.2) |
| ***Esox lucius***  (northern pike) | El | Eluc_V3 GCF_000721915.3 | XP_010889900.1 | | XP_010896496.1 | | NP_001290778.1 | | XP_019900858.1 | | XP_010896763.1 | XP_010901968.1 |
| Salmonids | ***+ Salmonid-specific 4R duplications :*** | | | **a1** | **a2** | **b1** | **b2** | **a1** | **a2** | **b1** | **b2** |  |  |
| ***Oncorhynchus kisutch***  (coho salmon) | Ok | Okis_V1 GCF_002021735.1 | XP_020343009.1 | XP_020352758.1 | XP_020357676.1 |  | XP_020359088.1 | XP_020364257.1 |  |  |  | XP_020359149.1 |
| ***Oncorhynchus mykiss***  (rainbow trout) | Om | Omyk_1.0 GCF_002163495.1 | XP_021429243.1 | XP_021472847.1 | XP_021439178.1 |  | XP_021444087.1 | XP_021438630.1 |  |  |  | XP_021438982.1 |
| ***Salmo salar***  (Atlantic salmon) | Ss | ICSASG_v2 GCF_000233375.1 | XP_014064448.1 | XP_014050730.1 | XP_014068290.1 |  | XP_014018602.1 | XP_014070615.1 |  |  | **pseudogene : LOC106568030** | XP_014068723.1 |

*Note : depending on availability, protein references given as RefSeq, alternatively as Uniprot*
